# Supplementary material for: Examining the Relationship between Phytoplankton Community Structure and Water Quality Measurements in Agricultural Waters: A Machine Learning Application
Source: MDPI journal article supplement (doi:10.3390/environments9110142), 2022-11-12
Supplement: s1 [file s1]

## Article

# Examining the Relationship between Phytoplankton Community Structure and Water Quality Measurements in Agricultural Waters: A Machine Learning Application

Jaclyn E. Smith <sup>1,2,3</sup>, Jennifer L. Wolny <sup>4</sup>, Robert L. Hill <sup>2</sup>, Matthew D. Stocker <sup>1,2,3</sup> and Yakov Pachepsky <sup>1,\*</sup>

<sup>1</sup> Environmental Microbial and Food Safety Laboratory, Beltsville Agricultural Research Center, ARS-USDA, Beltsville, MD 20705, USA

<sup>2</sup> Department of Environmental Science and Technology, University of Maryland, College Park, MD 20742, USA

<sup>3</sup> Oak Ridge Institute for Science and Education, Oak Ridge, TN 37831, USA

<sup>4</sup> Center for Food Safety and Applied Nutrition, Office of Regulatory Science, FDA, College Park, MD 20740, USA

\* Correspondence: yakov.pachepsky@usda.gov

## 1. Supplementary Material

**Citation:** Smith, J.E.; Wolny, J.L.; Hill, R.L.; Stocker, M.D.; Pachepsky, Y. Examining the Relationship between Phytoplankton Community Structure and Water Quality Measurements in Agricultural Waters: A Machine Learning Application. *Environments* **2022**, *9*, 142. <https://doi.org/10.3390/environments9110142>

Academic Editor: Naresh Singhal

Received: 30 September 2022

Accepted: 9 November 2022

Published: 12 November 2022

**Publisher's Note:** MDPI stays neutral with regard to jurisdictional claims in published maps and institutional affiliations.

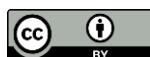

**Copyright:** © 2022 by the authors. Submitted for possible open access publication under the terms and conditions of the Creative Commons Attribution (CC BY) license (<https://creativecommons.org/licenses/by/4.0/>).

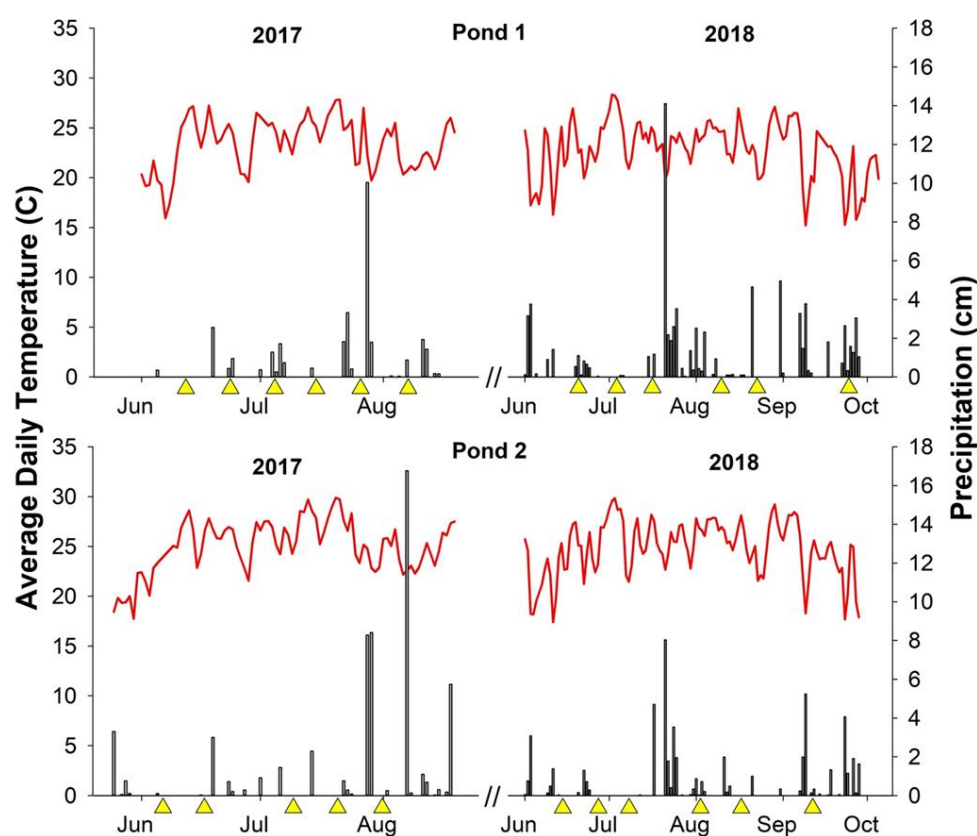

**Figure S1.** Weather data for Pond 1 and Pond 2 for 2017 and 2018. Average daily temperature readings are represented by the red line and daily precipitation is represented by black bars. Sampling dates are indicated with a yellow triangle at the x axis.

**Table S1.** Time series data of water quality parameters for Pond 1 and Pond 2 for 2017, 2018, and 2019.

| Date          | Temp | DO   | SPC   | pH  | NTU  | Phyco | CHL  | fDOM | CDOM  |
|---------------|------|------|-------|-----|------|-------|------|------|-------|
| <b>Pond 1</b> |      |      |       |     |      |       |      |      |       |
| 6/7/17        | 22.7 | 10.5 | 156.4 | 8.5 | 2.9  | 0.2   | 1.9  | 3.4  | n/a   |
| 6/21/17       | 27.1 | 9.1  | 168.9 | 8.7 | 4.8  | 0.3   | 2.3  | 2.2  | n/a   |
| 7/5/17        | 28.0 | 11.9 | 170.2 | 9.4 | 4.1  | 0.9   | 6.3  | 4.8  | n/a   |
| 7/18/17       | 29.1 | 11.0 | 175.8 | 8.9 | 7.4  | 2.3   | 7.6  | 6.2  | n/a   |
| 8/2/17        | 25.4 | 10.2 | 150.7 | 8.6 | 6.3  | 1.2   | 1.7  | 36.7 | n/a   |
| 8/16/17       | 25.4 | 9.6  | 153.1 | 8.8 | 5.5  | 1.9   | 3.3  | 25.0 | n/a   |
| <b>Pond 2</b> |      |      |       |     |      |       |      |      |       |
| 5/31/17       | 24.5 | 16.9 | 151.5 | 9.4 | 4.8  | 0.9   | 8.7  | 32.6 | n/a   |
| 6/13/17       | 30.7 | 14.5 | 160.1 | 8.8 | 8.4  | 2.9   | 15.1 | 25.0 | n/a   |
| 7/11/17       | 29.8 | 12.0 | 174.8 | 8.2 | 3.9  | 1.6   | 12.3 | 23.6 | n/a   |
| 7/25/17       | 29.6 | 10.3 | 179.1 | 8.1 | 32.2 | 11.7  | 15.3 | 28.3 | n/a   |
| 8/8/17        | 22.2 | 5.4  | 141.6 | 6.5 | 4.8  | 0.3   | 2.4  | 42.2 | n/a   |
| <b>Pond 1</b> |      |      |       |     |      |       |      |      |       |
| 6/20/18       | 26.6 | 11.6 | 141.4 | 8.5 | 8.8  | 2.5   | 2.4  | 21.4 | 85.0  |
| 7/5/18        | 29.6 | 7.9  | 156.4 | 7.3 | 3.8  | 0.6   | 1.1  | 7.1  | 43.4  |
| 7/19/18       | 28.3 | 9.0  | 166.9 | 7.3 | 2.6  | 0.3   | 1.0  | 1.9  | 32.3  |
| 8/15/18       | 26.8 | 10.5 | 146.5 | 7.5 | 2.5  | 0.6   | 4.6  | 29.9 | 95.3  |
| 8/29/18       | 27.7 | 11.2 | 132.8 | 8.1 | 4.0  | 0.9   | 6.9  | 25.6 | 102.6 |
| 10/4/18       | 23.0 | 10.2 | 149.0 | 7.4 | 3.6  | 0.8   | 0.7  | 38.4 | 102.2 |
| <b>Pond 2</b> |      |      |       |     |      |       |      |      |       |
| 6/14/18       | 25.5 | 20.7 | 136.4 | 8.8 | 9.3  | 6.1   | 36.6 | 39.6 | 211.7 |
| 6/26/18       | 27.1 | 16.8 | 146.3 | 8.5 | 6.0  | 4.2   | 26.3 | 30.0 | 166.2 |
| 7/10/18       | 28.6 | 11.1 | 162.1 | 7.5 | 10.2 | 4.5   | 12.9 | 27.5 | 133.3 |
| 8/7/18        | 31.9 | 14.1 | 124.8 | 8.5 | 18.7 | 4.7   | 17.0 | 40.8 | 203.3 |
| 8/23/18       | 25.9 | 11.5 | 139.6 | 7.4 | 18.5 | 5.0   | 13.7 | 38.8 | 188.5 |
| 9/20/18       | 26.2 | 15.3 | 146.4 | 8.3 | 20.5 | 4.7   | 13.3 | 32.8 | 159.0 |
| <b>Pond 1</b> |      |      |       |     |      |       |      |      |       |
| 6/6/19        | 24.6 | 9.3  | 122.5 | 7.5 | 1.8  | 0.1   | 0.4  | 8.7  | 41.5  |
| 7/2/19        | 28.1 | 16.8 | 150.2 | 9.7 | 4.1  | 1.0   | 7.2  | 15.9 | 110.2 |
| 8/8/19        | 27.6 | 8.8  | 158.1 | 8.3 | 7.2  | 0.9   | 5.9  | 11.2 | 74.3  |
| <b>Pond 2</b> |      |      |       |     |      |       |      |      |       |
| 6/4/19        | 24.7 | 14.0 | 170.3 | 8.3 | 8.9  | 3.6   | 17.2 | 27.7 | 127.7 |
| 6/26/19       | 28.1 | 14.7 | 170.8 | 8.2 | 7.5  | 5.4   | 31.7 | 28.4 | 128.2 |

**Table S2.** Summary statistics for all measured parameters and phytoplankton groups for 2017, 2018, and 2019.

| <b>Minimum, maximum, mean, and median values of measured phytoplankton functional groups and water quality data for 2017 and 2018</b> |             |               |       |       |        |               |       |       |        |
|---------------------------------------------------------------------------------------------------------------------------------------|-------------|---------------|-------|-------|--------|---------------|-------|-------|--------|
| Variable                                                                                                                              | Units       | <b>Pond 1</b> |       |       |        | <b>Pond 2</b> |       |       |        |
| 2017                                                                                                                                  |             | Min           | Max   | Mean  | Median | Min           | Max   | Mean  | Median |
| Diatoms Grouped                                                                                                                       | Log cells/L | 4.19          | 7.59  | 5.94  | 6.00   | 4.19          | 7.77  | 6.32  | 6.46   |
| Green Algae Grouped                                                                                                                   | Log cells/L | 6.03          | 8.08  | 7.10  | 7.14   | 4.97          | 8.18  | 6.92  | 7.08   |
| Cyanobacteria Grouped                                                                                                                 | Log cells/L | 4.74          | 7.91  | 5.98  | 6.11   | 4.67          | 8.69  | 6.14  | 5.81   |
| TEMP                                                                                                                                  | °C          | 22.33         | 29.84 | 26.31 | 26.34  | 21.81         | 33.74 | 27.37 | 29.16  |

|                         |             |        |         |         |         |        |         |         |         |
|-------------------------|-------------|--------|---------|---------|---------|--------|---------|---------|---------|
| DO                      | mg/L        | 8.14   | 15.44   | 10.39   | 10.24   | 2.74   | 24.87   | 11.82   | 12.01   |
| SPC                     | uS/cm       | 149.50 | 178.30  | 162.52  | 162.15  | 138.90 | 183.20  | 161.41  | 160.15  |
| pH                      |             | 6.90   | 9.56    | 8.82    | 8.84    | 6.18   | 9.90    | 8.18    | 8.49    |
| NTU                     |             | 1.81   | 23.78   | 5.16    | 5.05    | 1.52   | 68.61   | 10.82   | 4.73    |
| Phyco                   | RFU         | 0.12   | 8.43    | 1.14    | 0.93    | -0.27  | 34.18   | 3.49    | 0.83    |
| CHL                     | RFU         | 0.87   | 46.54   | 3.83    | 2.21    | 0.84   | 123.31  | 10.74   | 5.83    |
| FDOM                    | ppb         | -0.05  | 39.53   | 13.06   | 5.29    | 9.39   | 47.63   | 30.34   | 29.11   |
| <b>2018</b>             |             |        |         |         |         |        |         |         |         |
| Diatoms Grouped         | Log cells/L | 4.45   | 7.22    | 5.61    | 5.75    | 4.49   | 7.42    | 5.63    | 5.79    |
| Green Algae Grouped     | Log cells/L | 5.49   | 7.78    | 6.70    | 6.72    | 4.89   | 8.08    | 7.10    | 7.15    |
| Cyanobacteria Grouped   | Log cells/L | 4.19   | 7.95    | 5.64    | 4.19    | 5.29   | 8.38    | 7.08    | 7.25    |
| TEMP                    | °C          | 22.34  | 30.10   | 26.99   | 27.06   | 24.00  | 36.28   | 27.54   | 26.95   |
| DO                      | mg/L        | 7.04   | 12.68   | 10.07   | 10.41   | 5.83   | 27.18   | 14.91   | 14.94   |
| SPC                     | uS/cm       | 1.70   | 168.10  | 148.83  | 149.05  | 10.10  | 164.10  | 142.59  | 145.70  |
| pH                      |             | 6.47   | 8.67    | 7.65    | 7.46    | 6.46   | 9.31    | 8.17    | 8.37    |
| NTU                     |             | 1.20   | 24.00   | 4.20    | 3.28    | 1.00   | 178.46  | 13.86   | 9.85    |
| Phyco                   | RFU         | 0.10   | 10.65   | 0.95    | 0.61    | 0.45   | 35.11   | 4.86    | 3.32    |
| CHL                     | RFU         | 0.51   | 11.12   | 2.80    | 1.79    | 1.37   | 166.42  | 19.97   | 10.43   |
| FDOM                    | ppb         | 0.49   | 41.25   | 20.72   | 23.60   | 9.09   | 50.64   | 34.90   | 35.58   |
| CDOM                    | ug/L        | 29.94  | 113.15  | 76.80   | 91.38   | 93.54  | 826.40  | 177.00  | 161.97  |
| Submerged Light - 0cm   |             | 7.00   | 1809.00 | 712.72  | 793.00  | 55.00  | 2128.00 | 1113.02 | 1195.50 |
| Submerged Light - 7.5cm |             | 7.00   | 1578.00 | 624.42  | 653.50  | 7.00   | 1946.00 | 810.60  | 848.50  |
| Submerged Light - 15cm  |             | 6.00   | 1479.00 | 540.88  | 546.50  | 5.00   | 1933.00 | 578.13  | 607.00  |
| PAR                     |             | 4.00   | 1278.00 | 950.46  | 928.00  | 48.00  | 2200.00 | 1312.86 | 1373.00 |
| <b>2019</b>             |             |        |         |         |         |        |         |         |         |
| Diatoms Grouped         | Log cells/L | 4.66   | 6.22    | 5.39    | 5.29    | 5.30   | 6.97    | 6.19    | 6.27    |
| Green algae Grouped     | Log cells/L | 6.11   | 7.74    | 7.31    | 7.52    | 6.39   | 7.53    | 7.04    | 7.02    |
| Cyanobacteria Grouped   | Log cells/L | 0.00   | 7.22    | 0.74    | 0.00    | 6.09   | 7.85    | 6.82    | 6.81    |
| TEMP                    | °C          | 23.80  | 29.60   | 26.71   | 27.14   | 23.46  | 30.12   | 26.39   | 26.96   |
| DO                      | mg/L        | 7.70   | 17.18   | 11.58   | 9.31    | 3.02   | 20.53   | 14.32   | 14.80   |
| SPC                     | uS/cm       | 39.30  | 158.60  | 143.58  | 150.40  | 99.00  | 178.90  | 170.55  | 171.60  |
| pH                      |             | 7.30   | 9.70    | 8.49    | 8.30    | 6.83   | 9.22    | 8.27    | 8.45    |
| NTU                     |             | 1.41   | 12.49   | 4.39    | 3.28    | 3.23   | 16.48   | 8.20    | 7.75    |
| Phyco                   | RFU         | 0.00   | 1.42    | 0.69    | 0.88    | 0.65   | 12.41   | 4.47    | 3.55    |
| CHL                     | RFU         | 0.28   | 9.96    | 4.59    | 5.72    | 1.23   | 67.11   | 24.45   | 15.38   |
| FDOM                    | ppb         | 4.38   | 20.37   | 12.00   | 11.32   | 22.08  | 31.85   | 28.05   | 28.41   |
| CDOM                    | ug/L        | 39.13  | 121.08  | 75.62   | 74.76   | 98.21  | 218.89  | 127.94  | 113.50  |
| Submerged Light - 0cm   |             | 370.00 | 1773.00 | 971.82  | 888.00  | 359.00 | 1895.00 | 1249.25 | 1158.00 |
| Submerged Light - 7.5cm |             | 269.00 | 1499.00 | 834.47  | 679.00  | 52.00  | 1459.00 | 886.75  | 792.50  |
| Submerged Light - 15cm  |             | 275.00 | 1417.00 | 700.70  | 541.50  | 16.00  | 1175.00 | 629.95  | 620.50  |
| PAR                     |             | 518.00 | 2124.00 | 1308.65 | 1185.50 | 997.00 | 2073.00 | 1657.53 | 1823.50 |

**Table S3.** Pearson correlation coefficients between water quality parameters in 2017 and 2018.

| Variable pair | 2017-P1            | 2017-P2  | 2018-P1 | 2018-P2 |
|---------------|--------------------|----------|---------|---------|
| TEMP-SPC      | 0.804**            | 0.803**  |         |         |
| TEMP-FDOM     |                    | -0.869** |         |         |
| DO-pH         | 0.606*             | 0.937**  | 0.767** | 0.893** |
| DO-FDOM       |                    |          | 0.590*  |         |
| pH-FDOM       |                    | 0.576*   |         |         |
| SPC-FDOM      | -0.738**           | -0.710** |         |         |
| NTU-Phyco     | 0.682*             | 0.640*   | 0.763** | 0.537*  |
| NTU-CHL       | 0.589 <sup>¶</sup> |          |         |         |
| Phyco-CHL     | 0.756**            | 0.654*   |         | 0.819** |

Moderate ( $0.5 < r < 0.7$ , \*) and strong ( $r > 0.7$ , \*\*) coefficients.

**Table S4.** Spatial root-mean-squared errors (RMSEs) calculated by sampling location for 2017+2018 calculated for green algae, diatoms, and cyanobacteria using set A and AB parameters in Pond 1 and Pond 2.

| Pond 1   |             |         |               |              |         |               |
|----------|-------------|---------|---------------|--------------|---------|---------------|
| Location | Input set A |         |               | Input set AB |         |               |
|          | Green Algae | Diatoms | Cyanobacteria | Green Algae  | Diatoms | Cyanobacteria |
| 1        | 0.292       | 0.409   | 0.647         | 0.271        | 0.397   | 0.636         |
| 2        | 0.286       | 0.532   | 0.656         | 0.229        | 0.533   | 0.612         |
| 3        | 0.231       | 0.456   | 0.657         | 0.244        | 0.455   | 0.699         |
| 4        | 0.230       | 0.403   | 0.596         | 0.243        | 0.438   | 0.616         |
| 5        | 0.295       | 0.537   | 0.625         | 0.274        | 0.559   | 0.664         |
| 6        | 0.241       | 0.407   | 0.538         | 0.228        | 0.440   | 0.531         |
| 7        | 0.275       | 0.529   | 0.605         | 0.256        | 0.513   | 0.583         |
| 8        | 0.311       | 0.527   | 0.579         | 0.280        | 0.494   | 0.621         |
| 9        | 0.299       | 0.451   | 0.631         | 0.287        | 0.455   | 0.632         |
| 10       | 0.267       | 0.350   | 0.599         | 0.268        | 0.361   | 0.607         |
| 11       | 0.194       | 0.421   | 0.411         | 0.221        | 0.464   | 0.480         |
| 12       | 0.194       | 0.382   | 0.438         | 0.210        | 0.429   | 0.472         |
| 13       | 0.229       | 0.411   | 0.611         | 0.225        | 0.411   | 0.668         |
| 14       | 0.203       | 0.353   | 0.599         | 0.194        | 0.370   | 0.563         |
| 15       | 0.261       | 0.450   | 0.523         | 0.259        | 0.443   | 0.515         |
| 16       | 0.449       | 0.504   | 0.500         | 0.449        | 0.507   | 0.518         |
| 17       | 0.355       | 0.355   | 0.570         | 0.328        | 0.334   | 0.579         |
| 18       | 0.262       | 0.484   | 0.510         | 0.252        | 0.477   | 0.537         |
| 19       | 0.280       | 0.463   | 0.583         | 0.253        | 0.437   | 0.597         |
| 20       | 0.234       | 0.427   | 0.507         | 0.212        | 0.443   | 0.538         |
| 21       | 0.251       | 0.391   | 0.582         | 0.230        | 0.399   | 0.544         |
| 22       | 0.323       | 0.521   | 0.520         | 0.267        | 0.532   | 0.551         |
| 23       | 0.427       | 0.490   | 0.551         | 0.376        | 0.503   | 0.551         |
| Pond 2   |             |         |               |              |         |               |
| 1        | 0.414       | 0.588   | 0.686         | 0.394        | 0.606   | 0.668         |
| 3        | 0.297       | 0.550   | 0.669         | 0.333        | 0.609   | 0.665         |
| 5        | 0.345       | 0.620   | 0.656         | 0.373        | 0.621   | 0.743         |
| 7        | 0.435       | 0.644   | 0.657         | 0.452        | 0.650   | 0.665         |
| 9        | 0.494       | 0.698   | 0.799         | 0.480        | 0.679   | 0.761         |
| 11       | 0.419       | 0.707   | 0.892         | 0.432        | 0.652   | 0.798         |
| 13       | 0.463       | 0.764   | 0.766         | 0.514        | 0.784   | 0.761         |
| 15       | 0.468       | 0.537   | 0.843         | 0.476        | 0.528   | 0.833         |
| 17       | 0.505       | 0.477   | 0.794         | 0.522        | 0.478   | 0.771         |
| 19       | 0.351       | 0.499   | 0.732         | 0.350        | 0.563   | 0.697         |
| 21       | 0.395       | 0.601   | 0.716         | 0.381        | 0.577   | 0.688         |
| 23       | 0.304       | 0.581   | 0.561         | 0.313        | 0.571   | 0.606         |
| 25       | 0.288       | 0.668   | 0.644         | 0.282        | 0.639   | 0.651         |
| 26       | 0.312       | 0.546   | 0.686         | 0.324        | 0.587   | 0.768         |
| 27       | 0.220       | 0.500   | 0.586         | 0.262        | 0.469   | 0.570         |
| 28       | 0.289       | 0.551   | 0.642         | 0.300        | 0.548   | 0.592         |
| 29       | 0.374       | 0.590   | 0.574         | 0.361        | 0.610   | 0.562         |
| 30       | 0.242       | 0.568   | 0.620         | 0.261        | 0.583   | 0.618         |
| 31       | 0.272       | 0.425   | 0.628         | 0.310        | 0.516   | 0.617         |
| 32       | 0.268       | 0.445   | 0.634         | 0.268        | 0.496   | 0.549         |
| 33       | 0.298       | 0.592   | 0.531         | 0.318        | 0.540   | 0.522         |
| 34       | 0.381       | 0.571   | 0.728         | 0.415        | 0.568   | 0.719         |

**Table S5.** Percent of dates in which the coefficient of variation (CV) was larger for nearshore locations.

| Parameter   | Pond 1 % | Pond 2 % |
|-------------|----------|----------|
| Green algae | 41.7     | 63.6     |

|               |       |       |
|---------------|-------|-------|
| Diatoms       | 66.7  | 63.6  |
| Cyanobacteria | 66.7  | 54.6  |
| TEMP          | 75.0  | 81.8  |
| DO            | 100.0 | 90.9  |
| SPC           | 75.0  | 63.6  |
| pH            | 100.0 | 100.0 |
| NTU           | 91.7  | 81.8  |
| Phyco         | 91.7  | 72.7  |
| CHL           | 75.0  | 81.8  |
| FDOM          | 75.0  | 90.9  |
